# Supplementary material
Source: PubMed Central journal article supplement (PMC3667266)

**Supplemental Table 1.** Diagnostic codes used to ascertain cardiovascular cause of death.

| <b>CARDIOVASCULAR DEATH CODES</b> |                                                                 |
|-----------------------------------|-----------------------------------------------------------------|
| <b>ICD10 CODES*</b>               | <b>CONDITION</b>                                                |
| I00-I78                           | Major cardiovascular diseases                                   |
| I00-I09,I11,I13,I20-I51           | Diseases of heart                                               |
| I00-I09                           | Acute rheumatic fever and chronic rheumatic heart diseases      |
| I11                               | Hypertensive heart disease                                      |
| I13                               | Hypertensive heart and renal disease                            |
| I20-I25                           | Ischemic heart diseases                                         |
| I21-I22                           | Acute myocardial infarction                                     |
| I24                               | Other acute ischemic heart diseases                             |
| I20,I25                           | Other forms of chronic ischemic heart disease                   |
| I25.0                             | Atherosclerotic cardiovascular disease, so described            |
| I20,I25.1-I25.9                   | All other forms of chronic ischemic heart disease               |
| I26-I51                           | Other heart diseases                                            |
| I33                               | Acute and subacute endocarditis                                 |
| I30-I31,I40                       | Diseases of pericardium and acute myocarditis                   |
| I50                               | Heart failure                                                   |
| I26-I28,I34-I38,I42-I49,I51       | All other forms of heart disease                                |
| I10,I12                           | Essential (primary) hypertension and hypertensive renal disease |
| I60-I69                           | Cerebrovascular diseases                                        |
| I70                               | Atherosclerosis                                                 |
| I71-I78                           | Other diseases of circulatory system                            |
| I71                               | Aortic aneurysm and dissection                                  |
| I72-I78                           | Other diseases of arteries, arterioles and capillaries          |
| I80-I99                           | Other disorders of circulatory system                           |

\*Cause of death was ascertained using ICD-9 and ICD-10 codes for deaths occurring pre- and post-1999. Deaths occurring pre-1999 were coded under ICD-9 guidelines were recoded into comparable ICD-10 based underlying cause of death groups by the National Center for Health Statistics.

**Supplemental Table 2.** Comparison of baseline characteristics between thyroid functional status categories as defined by thyrotropin levels only.\*

|                                   | EUTHYROID<br>(n=14,130) | SUBCLINICAL HYPOTHYROID<br>(n=568) |
|-----------------------------------|-------------------------|------------------------------------|
| TSH (mIU/L)                       |                         |                                    |
| Median                            | 1.49                    | 5.73                               |
| [IQR]                             | [1.00, 2.10]            | [5.20, 7.14]                       |
| Min-Max                           | 0.39-4.60               | 4.65-10.0                          |
| Age (years)                       | 45.4 ± 19.2             | 59.0 ± 19.6<br>p<0.001             |
| Female sex                        | 52.4%                   | 61.8%<br>p<0.001                   |
| Race                              |                         |                                    |
| White                             | 40.1%                   | 58.5%                              |
| African-American                  | 28.1%                   | 10.4%                              |
| Mexican-American                  | 27.6%                   | 27.5%                              |
| Other                             | 4.1%                    | 3.7%                               |
|                                   |                         | p<0.001                            |
| Diabetes                          |                         |                                    |
| Yes                               | 7.5%                    | 10.4%                              |
| No                                | 92.4%                   | 89.4%                              |
| Don't Know/Blank                  | 0.1%                    | 0.2%                               |
|                                   |                         | p=0.03                             |
| Active smoking                    | 26.1%                   | 14.1%<br>p<0.001                   |
| eGFR (ml/min/1.73m <sup>2</sup> ) |                         |                                    |
| ≥60                               | 93.9%                   | 80.8%                              |
| 30-59                             | 5.7%                    | 17.1%                              |
| <30                               | 0.4%                    | 2.1%                               |
|                                   |                         | p<0.001                            |
| ACR (mg/g)                        |                         |                                    |
| <30                               | 87.1%                   | 78.5%                              |
| 30-299                            | 8.9%                    | 13.4%                              |
| ≥300                              | 1.9%                    | 3.2%                               |
| Missing                           | 2.1%                    | 4.9%                               |
|                                   |                         | <0.001                             |
| Congestive Heart Failure          |                         |                                    |
| Yes                               | 2.9%                    | 7.4%                               |
| No                                | 97.1%                   | 92.6%                              |
|                                   |                         | <0.001                             |
| Hypertension                      |                         |                                    |
| Yes                               | 25.4%                   | 35.2%                              |
| No                                | 73.8%                   | 64.8%                              |
| Don't Know/Blank                  | 0.9%                    | 0.0%                               |
|                                   |                         | p<0.001                            |
| Hypercholesterolemia              |                         |                                    |
| Yes                               | 16.5%                   | 25.5%                              |
| No                                | 33.0%                   | 36.3%                              |
| Don't Know/Blank                  | 50.6%                   | 38.2%                              |
|                                   |                         | p<0.001                            |
| Prior stroke                      |                         |                                    |
| Yes                               | 2.4%                    | 5.6%                               |

|                                                                                        |                                                 |                                                          |
|----------------------------------------------------------------------------------------|-------------------------------------------------|----------------------------------------------------------|
| No<br>Don't Know/Blank                                                                 | 97.6%<br>0.0%                                   | 94.4%<br>0.0%<br>p<0.001                                 |
| Prior MI<br>Yes<br>No<br>Don't Know/Blank                                              | 3.7%<br>95.2%<br>1.2%                           | 8.3%<br>90.5%<br>1.2%<br>p<0.001                         |
| BMI (kg/m <sup>2</sup> )<br><18.5<br>18.5-24.9<br>25-29.9<br>30-34.9<br>35-39.9<br>≥40 | 2.2%<br>38.3%<br>34.4%<br>16.1%<br>5.7%<br>3.3% | 1.6%<br>34.2%<br>35.7%<br>16.6%<br>8.1%<br>3.9%<br>p=0.1 |
| Exogenous thyroid hormone use                                                          | 1.3%                                            | 7.6%<br>p<0.001                                          |

\* Data presented as mean +/- SD or proportions unless otherwise indicated. Significance testing compared between subclinical hypothyroid and euthyroid subjects by 2-sample t-test, Wilcoxon rank sum test, or chi-squared test.

† Thyroid functional status categorized as: euthyroid (TSH within reference range); subclinical hypothyroid (TSH >ULN and ≤10mIU/L).

TSH, thyrotropin; TT4, total thyroxine; eGFR, estimated glomerular filtration rate; ACR, urine albumin/creatinine ratio; MI, myocardial infarction; CHF, congestive heart failure, BMI, body mass index; ULN, upper limit normal.

1 **Supplemental Figure Legends**

2

3 **Supplemental Figure 1.** Comparison of the association between subclinical hypothyroidism (thyrotropin  
4 [TSH] >assay upper limit of normal and  $\leq 10$ mIU/L) vs. euthyroidism (TSH within referent range) with  
5 all-cause mortality, stratified by pre-existing congestive heart failure (CHF) status. Analyses adjusted for  
6 age, sex, race/ethnicity, diabetes, smoking, hypertension, hypercholesterolemia, prior stroke, prior  
7 myocardial infarction, body mass index, albumin/creatinine ratio, and estimated glomerular filtration rate  
8 (each specified as per Table 1). Statistical significance of effect modification was assessed by likelihood  
9 ratio testing.

10

11 **Supplemental Figure 2.** Comparison of the association between subclinical hypothyroidism (thyrotropin  
12 [TSH] >assay upper limit of normal and  $\leq 10$ mIU/L) vs. euthyroidism (TSH within referent range) with  
13 all-cause mortality, stratified by race (black vs. non-black). Analyses adjusted for age, sex, diabetes,  
14 smoking, hypertension, hypercholesterolemia, prior stroke, prior myocardial infarction, pre-existing CHF,  
15 body mass index, albumin/creatinine ratio, and estimated glomerular filtration rate (each as specified in  
16 Table 1). Statistical significance of effect modification was assessed by likelihood ratio testing.

17

## All-Cause Mortality

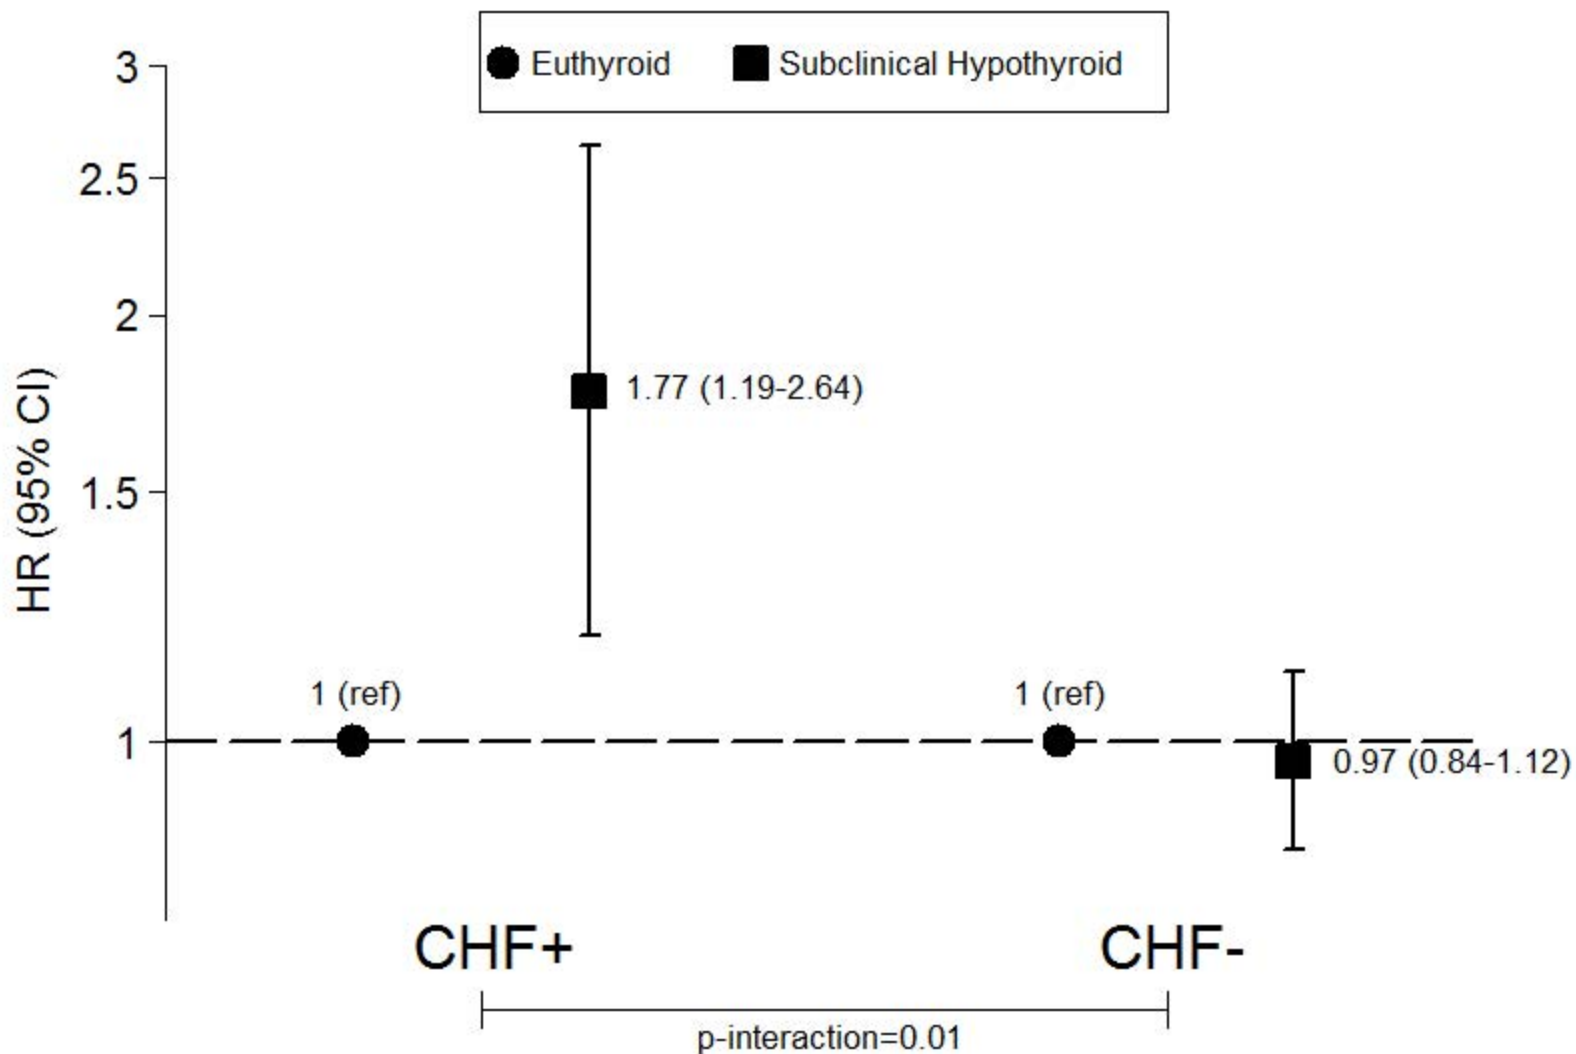

## All-Cause Mortality

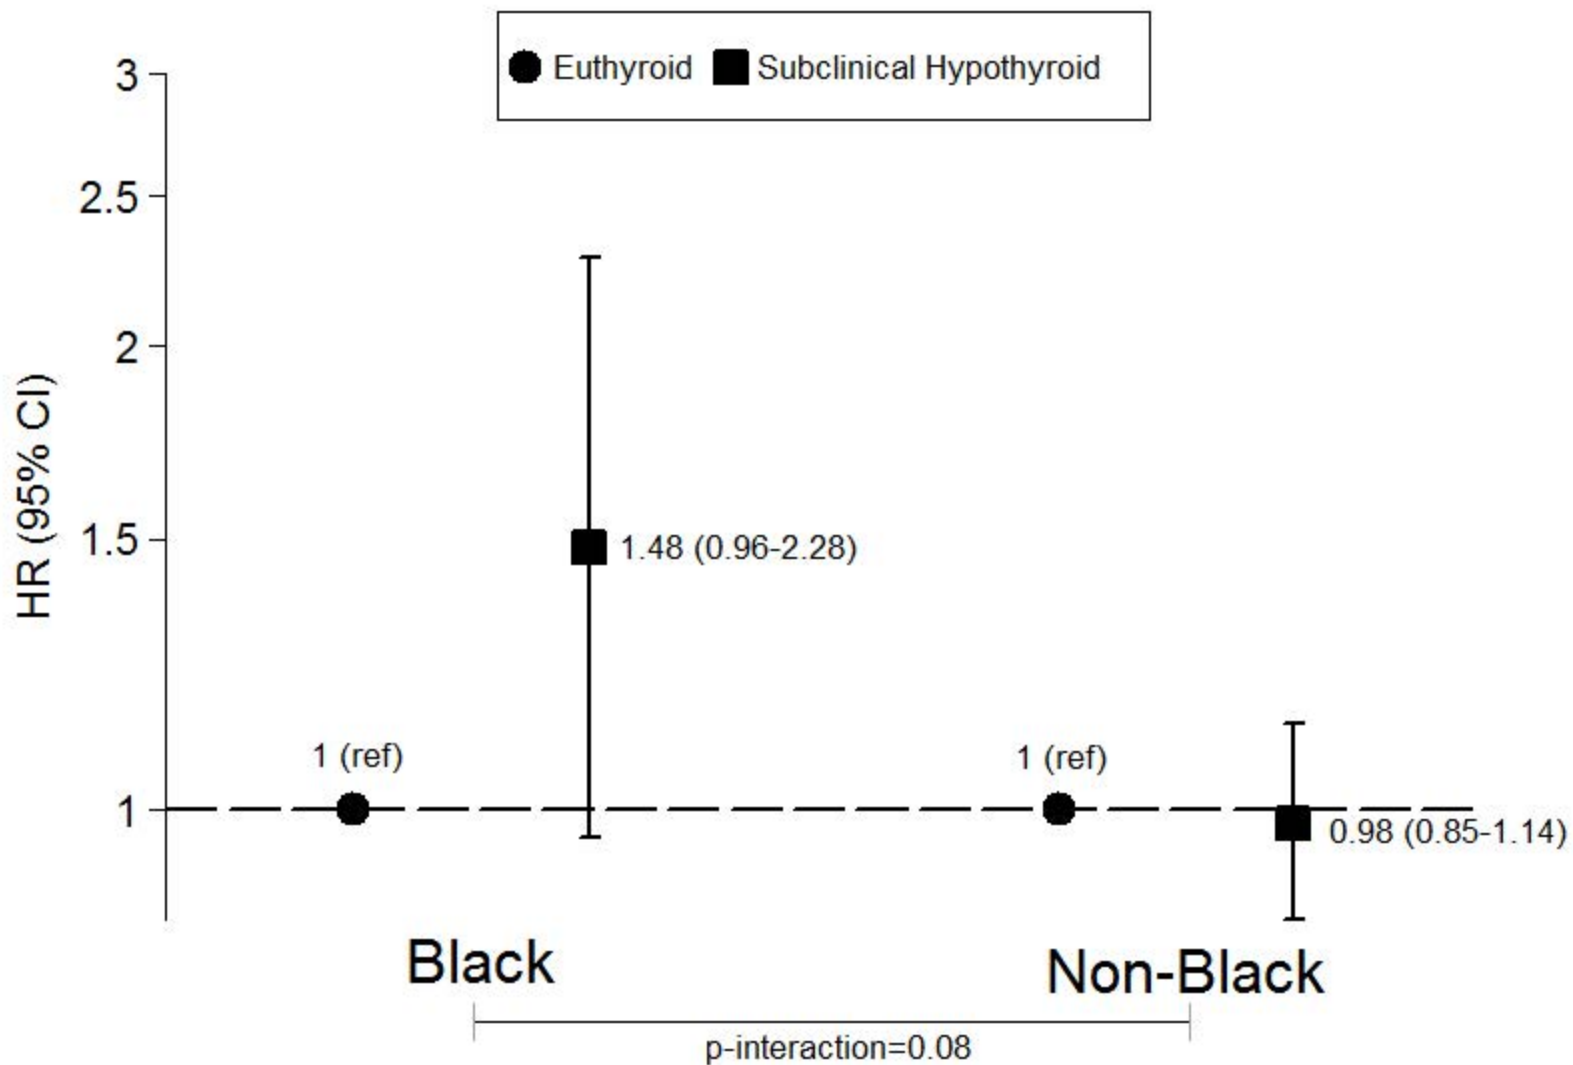

Supplement: supp_jc.2013-1039_JC-13-1039_2Tabs_2Figs.pdf [file supp_jc.2013-1039_JC-13-1039_2Tabs_2Figs.pdf]
